# Supplementary material for: Impact of Visual Context on Public Perceptions of Non-Human Primate Performers
Source: PLoS One. 2015 Feb 25;10(2):e0118487. doi: 10.1371/journal.pone.0118487 (PMC4340917; doi:10.1371/journal.pone.0118487)
Supplement: S1 Data — (XLSX) [file pone.0118487.s001.xlsx]

## Sheet: Data
ID	Gender	Species	Human	Context	Pet	Conserv	Scared	Funny	Happy	Nervous	Sad	Dangerous
1	M	C	NH	A	M	IDK	0	0	1	1	0	0
2	F	C	H	A	N	IDK	0	1	1	0	0	0
3	M	C	H	A	N	IDK	0	0	1	1	0	0
4	F	C	H	A	N	IDK	0	0	1	1	0	0
5	F	C	H	A	N	IDK	0	0	1	1	0	0
6	M	C	H	A	N	IDK	0	0	0	1	0	0
7	F	C	H	A	N	IDK	0	0	1	0	0	0
8	M	C	H	A	N	IDK	0	0	1	1	0	0
9	F	C	H	N	N	IDK	1	0	0	0	0	0
10	M	C	H	N	N	IDK	0	1	0	1	1	0
11	F	C	H	N	N	IDK	0	1	0	0	0	0
12	M	C	H	N	N	IDK	0	0	1	1	0	0
13	F	C	H	N	N	IDK	0	0	1	1	0	0
14	F	C	H	N	N	IDK	0	0	1	0	0	0
15	F	C	H	N	N	IDK	0	0	0	1	0	0
16	M	C	H	N	N	IDK	0	0	0	1	0	1
17	F	C	H	N	N	IDK	0	1	1	0	0	1
18	M	C	NH	A	N	IDK	0	0	0	1	0	0
19	F	C	NH	A	N	IDK	0	0	1	1	0	0
20	F	C	NH	A	N	IDK	0	1	1	1	0	0
21	F	C	NH	A	N	IDK	0	0	1	1	0	0
22	F	C	NH	A	N	IDK	0	0	1	1	0	0
23	F	C	NH	A	N	IDK	0	0	1	1	0	0
24	F	C	NH	A	N	IDK	0	0	0	1	0	1
25	F	C	NH	A	N	IDK	0	0	0	0	0	0
26	F	C	NH	A	N	IDK	0	0	1	1	0	0
27	F	C	NH	A	N	IDK	0	0	1	1	0	1
28	M	C	NH	A	N	IDK	0	0	1	0	0	0
29	F	C	NH	A	N	IDK	0	1	0	1	0	0
30	F	C	NH	A	N	IDK	0	0	1	1	0	1
31	F	C	NH	A	N	IDK	0	0	1	1	0	0
32	M	C	NH	A	N	IDK	0	0	1	1	0	0
33	M	C	NH	A	N	IDK	0	0	1	1	0	0
34	F	C	NH	A	N	IDK	0	0	1	1	0	0
35	M	C	NH	N	N	IDK	0	0	1	1	0	0
36	M	C	NH	N	N	IDK	0	0	1	1	0	0
37	F	C	NH	N	N	IDK	0	0	1	1	0	0
38	F	C	NH	N	N	IDK	0	0	1	1	0	0
39	F	C	NH	N	N	IDK	0	0	1	1	0	0
40	F	C	NH	N	N	IDK	0	1	1	1	0	0
41	M	C	NH	N	N	IDK	0	0	1	0	0	0
42	F	C	NH	N	N	IDK	0	1	1	1	0	1
43	F	C	NH	N	N	IDK	0	0	1	1	0	1
44	F	C	NH	N	N	IDK	0	0	1	0	0	1
45	F	C	NH	N	N	IDK	0	0	1	1	1	0
46	F	C	NH	N	N	IDK	0	0	0	1	0	0
47	F	C	NH	N	N	IDK	0	0	1	0	0	0
48	M	C	NH	N	N	IDK	0	0	0	1	0	0
49	F	C	NH	N	N	IDK	0	0	1	0	0	1
50	F	C	NH	N	N	IDK	0	0	1	1	0	0
51	M	C	NH	N	N	IDK	0	0	1	0	0	0
52	M	C	NH	N	N	IDK	0	1	1	0	0	0
53	M	C	NH	N	N	IDK	0	1	1	1	0	0
54	M	C	NH	N	N	IDK	0	0	1	1	0	0
55	F	C	NH	N	N	IDK	0	0	1	1	0	0
56	F	C	NH	N	N	IDK	0	0	1	1	0	0
57	F	C	NH	N	N	IDK	0	1	1	0	0	1
58	F	C	NH	N	N	IDK	0	0	0	1	0	0
59	M	C	H	A	Y	IDK	0	0	1	1	0	0
60	F	C	H	A	Y	IDK	0	0	1	1	0	0
61	M	C	H	A	Y	IDK	0	1	0	1	0	0
62	M	C	H	A	Y	IDK	0	0	1	0	0	0
63	F	C	H	A	Y	IDK	0	0	1	1	0	0
64	F	C	H	A	Y	IDK	1	0	0	1	0	0
65	M	C	H	A	Y	IDK	0	0	0	1	0	0
66	F	C	H	N	Y	IDK	0	0	1	0	0	0
67	M	C	H	N	Y	IDK	0	0	1	0	0	0
68	F	C	H	N	Y	IDK	0	1	1	1	0	0
69	M	C	NH	A	Y	IDK	0	0	1	1	0	0
70	F	C	NH	A	Y	IDK	0	0	1	0	0	0
71	M	C	NH	A	Y	IDK	0	0	0	1	0	0
72	M	C	NH	A	Y	IDK	0	0	1	1	0	0
73	F	C	NH	A	Y	IDK	0	0	1	0	0	0
74	M	C	H	A	N	N	0	1	1	1	0	0
75	M	C	H	A	N	N	0	0	1	1	0	0
76	M	C	H	A	N	N	0	0	0	1	0	0
77	F	C	H	A	N	N	0	0	1	1	0	0
78	M	C	H	A	N	N	0	0	0	1	0	0
79	M	C	H	A	N	N	1	0	0	0	1	0
80	M	C	H	A	N	N	0	0	1	1	0	0
81	F	C	H	A	N	N	1	0	0	0	1	0
82	F	C	H	A	N	N	0	0	1	1	0	0
83	F	C	H	N	N	N	0	0	0	1	0	0
84	M	C	H	N	N	N	0	0	1	1	0	0
85	M	C	H	N	N	N	0	0	0	1	0	0
86	F	C	H	N	N	N	0	0	1	1	0	0
87	M	C	H	N	N	N	0	0	0	1	0	0
88	F	C	H	N	N	N	0	0	1	1	0	1
89	M	C	H	N	N	N	0	1	0	1	0	0
90	F	C	H	N	N	N	0	0	1	0	0	0
91	F	C	H	N	N	N	0	0	0	1	0	0
92	M	C	NH	A	N	N	0	0	1	1	0	0
93	M	C	NH	A	N	N	0	0	0	1	0	0
94	M	C	NH	A	N	N	0	0	1	0	0	0
95	M	C	NH	A	N	N	0	0	1	1	0	0
96	M	C	NH	A	N	N	0	0	1	1	0	1
97	F	C	NH	A	N	N	0	0	0	1	0	1
98	F	C	NH	A	N	N	0	0	1	1	0	0
99	F	C	NH	A	N	N	0	0	0	1	1	0
100	F	C	NH	A	N	N	0	1	1	1	0	0
101	F	C	NH	N	N	N	0	0	1	0	0	1
102	F	C	NH	N	N	N	0	1	0	0	0	0
103	F	C	NH	N	N	N	0	0	1	1	0	0
104	F	C	NH	N	N	N	0	0	1	1	0	0
105	F	C	NH	N	N	N	0	0	1	0	0	0
106	F	C	NH	N	N	N	0	1	1	1	0	0
107	M	C	NH	N	N	N	0	1	1	0	0	0
108	F	C	NH	N	N	N	0	0	1	0	0	0
109	F	C	H	A	Y	N	0	0	0	1	0	0
110	M	C	H	A	Y	N	0	0	1	1	0	0
111	F	C	H	A	Y	N	1	0	0	0	1	0
112	F	C	H	A	Y	N	0	0	1	0	0	0
113	F	C	NH	A	Y	N	0	0	1	1	0	0
114	F	C	NH	N	Y	N	0	1	1	0	0	0
115	M	C	NH	N	Y	N	0	1	0	1	0	0
116	F	C	NH	N	Y	N	0	1	1	1	0	0
117	F	C	NH	N	Y	N	0	1	1	0	0	0
118	M	C	NH	N	Y	N	0	0	0	0	1	1
119	M	C	H	N	M	Y	0	0	1	1	0	1
120	M	C	NH	A	M	Y	0	1	1	0	0	0
121	F	C	H	A	N	Y	0	1	1	1	0	0
122	F	C	H	A	N	Y	0	1	1	1	0	0
123	F	C	H	A	N	Y	0	1	0	0	0	0
124	M	C	H	A	N	Y	0	0	1	1	0	0
125	M	C	H	A	N	Y	0	0	1	0	0	0
126	F	C	H	A	N	Y	0	1	1	1	0	0
127	F	C	H	A	N	Y	0	0	1	1	0	0
128	F	C	H	A	N	Y	0	0	1	1	0	1
129	F	C	H	A	N	Y	0	1	1	1	0	0
130	M	C	H	A	N	Y	0	0	1	1	0	0
131	F	C	H	A	N	Y	0	0	1	1	0	0
132	F	C	H	A	N	Y	0	0	1	1	0	0
133	F	C	H	A	N	Y	0	1	1	1	0	0
134	M	C	H	A	N	Y	0	0	1	0	0	1
135	F	C	H	A	N	Y	0	0	0	1	0	0
136	F	C	H	A	N	Y	0	0	0	1	0	0
137	F	C	H	A	N	Y	1	0	0	0	0	0
138	M	C	H	A	N	Y	0	0	1	1	0	0
139	F	C	H	A	N	Y	0	0	1	1	0	0
140	F	C	H	A	N	Y	0	0	1	1	0	0
141	F	C	H	A	N	Y	0	0	1	1	0	0
142	F	C	H	A	N	Y	0	1	1	1	0	0
143	F	C	H	A	N	Y	0	0	1	0	0	1
144	F	C	H	A	N	Y	0	1	1	1	0	1
145	F	C	H	A	N	Y	0	1	1	0	0	0
146	F	C	H	A	N	Y	0	0	1	1	0	0
147	F	C	H	A	N	Y	0	0	1	1	0	0
148	F	C	H	A	N	Y	0	0	1	0	0	0
149	F	C	H	A	N	Y	1	0	0	0	0	1
150	F	C	H	A	N	Y	0	0	1	1	0	0
151	F	C	H	A	N	Y	1	0	0	0	0	0
152	F	C	H	A	N	Y	0	1	1	0	0	0
153	F	C	H	A	N	Y	0	0	1	1	0	0
154	M	C	H	A	N	Y	0	0	1	1	0	0
155	M	C	H	A	N	Y	0	0	1	1	0	0
156	F	C	H	A	N	Y	0	0	1	1	0	1
157	M	C	H	A	N	Y	1	0	0	1	0	0
158	F	C	H	A	N	Y	0	0	1	1	0	0
159	M	C	H	A	N	Y	0	0	0	1	0	0
160	F	C	H	A	N	Y	0	0	0	1	0	0
161	F	C	H	A	N	Y	0	0	1	0	0	0
162	F	C	H	A	N	Y	0	1	1	0	0	0
163	M	C	H	A	N	Y	0	1	0	0	0	0
164	F	C	H	A	N	Y	0	0	1	0	0	0
165	F	C	H	A	N	Y	0	0	0	1	0	0
166	F	C	H	A	N	Y	0	1	1	0	0	0
167	F	C	H	A	N	Y	0	0	0	1	0	0
168	F	C	H	A	N	Y	0	0	1	0	0	1
169	F	C	H	A	N	Y	0	0	1	1	0	0
170	M	C	H	A	N	Y	0	0	1	0	0	0
171	F	C	H	A	N	Y	0	0	1	1	0	0
172	M	C	H	A	N	Y	0	1	1	1	0	0
173	M	C	H	N	N	Y	0	0	1	1	0	0
174	F	C	H	N	N	Y	0	1	1	1	0	0
175	F	C	H	N	N	Y	0	1	1	0	0	0
176	F	C	H	N	N	Y	0	0	1	0	0	0
177	M	C	H	N	N	Y	0	0	1	1	0	0
178	F	C	H	N	N	Y	0	1	1	1	0	0
179	F	C	H	N	N	Y	0	0	1	1	0	0
180	F	C	H	N	N	Y	0	1	0	0	0	0
181	F	C	H	N	N	Y	0	1	1	1	0	0
182	F	C	H	N	N	Y	0	0	1	1	0	0
183	F	C	H	N	N	Y	0	0	1	0	0	0
184	M	C	H	N	N	Y	0	0	0	1	0	0
185	F	C	H	N	N	Y	0	1	0	1	0	0
186	M	C	H	N	N	Y	0	0	1	1	0	0
187	F	C	H	N	N	Y	0	1	1	1	0	0
188	M	C	H	N	N	Y	0	1	1	1	0	1
189	M	C	H	N	N	Y	0	0	1	1	0	0
190	M	C	H	N	N	Y	0	0	0	0	1	0
191	M	C	H	N	N	Y	0	1	1	1	0	0
192	F	C	H	N	N	Y	0	0	1	0	0	0
193	M	C	H	N	N	Y	0	0	1	0	0	0
194	M	C	H	N	N	Y	0	0	0	1	1	0
195	F	C	H	N	N	Y	1	0	0	1	0	0
196	M	C	H	N	N	Y	0	0	1	1	0	0
197	F	C	H	N	N	Y	0	0	1	1	0	0
198	M	C	H	N	N	Y	0	0	1	0	0	0
199	M	C	H	N	N	Y	0	0	1	1	0	0
200	F	C	H	N	N	Y	0	0	1	1	0	0
201	M	C	H	N	N	Y	0	0	0	1	0	0
202	F	C	H	N	N	Y	0	0	1	1	0	0
203	F	C	H	N	N	Y	0	0	1	1	0	0
204	F	C	H	N	N	Y	0	0	1	1	0	0
205	M	C	H	N	N	Y	0	0	1	0	0	1
206	M	C	H	N	N	Y	0	0	1	1	0	0
207	M	C	H	N	N	Y	0	0	0	1	0	0
208	F	C	H	N	N	Y	0	0	1	0	0	0
209	F	C	H	N	N	Y	0	0	1	0	0	1
210	M	C	H	N	N	Y	1	0	0	0	1	0
211	M	C	H	N	N	Y	0	0	0	1	0	0
212	M	C	H	N	N	Y	1	0	0	0	0	0
213	F	C	H	N	N	Y	0	0	0	1	0	0
214	F	C	H	N	N	Y	0	1	0	1	0	0
215	F	C	H	N	N	Y	0	0	1	0	0	0
216	F	C	H	N	N	Y	0	1	0	0	0	0
217	F	C	H	N	N	Y	0	1	1	1	0	0
218	M	C	H	N	N	Y	0	0	1	0	0	0
219	M	C	H	N	N	Y	0	1	1	1	0	0
220	F	C	H	N	N	Y	0	0	0	1	0	0
221	M	C	H	N	N	Y	0	0	1	1	0	1
222	F	C	H	N	N	Y	0	0	0	1	0	0
223	F	C	H	N	N	Y	1	0	0	0	0	0
224	F	C	H	N	N	Y	0	0	1	0	0	0
225	M	C	H	N	N	Y	0	0	0	1	0	1
226	F	C	H	N	N	Y	0	1	1	1	0	0
227	F	C	H	N	N	Y	0	1	0	0	0	0
228	F	C	H	N	N	Y	0	0	1	1	0	0
229	F	C	H	N	N	Y	0	0	1	1	0	0
230	M	C	H	N	N	Y	0	0	0	1	0	0
231	F	C	H	N	N	Y	0	0	1	1	0	0
232	M	C	H	N	N	Y	0	0	0	1	0	1
233	M	C	H	N	N	Y	1	0	0	1	0	0
234	F	C	H	N	N	Y	0	1	0	1	0	1
235	F	C	H	N	N	Y	0	0	1	1	0	0
236	M	C	NH	A	N	Y	0	0	1	1	0	0
237	M	C	NH	A	N	Y	0	0	0	0	0	0
238	F	C	NH	A	N	Y	0	1	1	1	0	0
239	M	C	NH	A	N	Y	0	1	1	1	0	0
240	M	C	NH	A	N	Y	0	0	1	0	0	0
241	F	C	NH	A	N	Y	0	1	0	0	0	1
242	F	C	NH	A	N	Y	0	1	1	1	0	0
243	F	C	NH	A	N	Y	0	1	0	1	0	0
244	F	C	NH	A	N	Y	0	1	1	1	0	1
245	F	C	NH	A	N	Y	0	0	1	0	0	1
246	F	C	NH	A	N	Y	0	0	1	1	0	0
247	M	C	NH	A	N	Y	0	0	1	1	0	0
248	F	C	NH	A	N	Y	0	0	0	1	0	0
249	F	C	NH	A	N	Y	0	1	0	1	0	0
250	F	C	NH	A	N	Y	0	1	1	1	0	0
251	M	C	NH	A	N	Y	0	1	1	1	0	0
252	F	C	NH	A	N	Y	0	1	1	1	0	0
253	F	C	NH	A	N	Y	0	0	1	1	0	0
254	F	C	NH	A	N	Y	0	0	1	1	0	0
255	M	C	NH	A	N	Y	0	0	1	0	0	0
256	F	C	NH	A	N	Y	0	0	1	0	0	1
257	F	C	NH	A	N	Y	0	0	1	1	0	0
258	F	C	NH	A	N	Y	0	0	1	0	0	0
259	F	C	NH	A	N	Y	0	0	1	0	0	0
260	M	C	NH	A	N	Y	0	0	0	1	0	0
261	F	C	NH	A	N	Y	0	0	0	1	0	0
262	F	C	NH	A	N	Y	0	0	0	0	1	0
263	F	C	NH	A	N	Y	0	0	1	1	0	0
264	F	C	NH	A	N	Y	0	0	0	1	0	0
265	M	C	NH	A	N	Y	0	0	0	1	0	0
266	M	C	NH	A	N	Y	0	0	1	1	0	0
267	F	C	NH	A	N	Y	1	0	0	0	0	0
268	F	C	NH	A	N	Y	0	1	1	0	0	0
269	M	C	NH	A	N	Y	0	0	0	0	1	0
270	M	C	NH	A	N	Y	0	1	1	1	0	0
271	F	C	NH	A	N	Y	0	1	1	1	0	0
272	F	C	NH	A	N	Y	0	0	1	1	0	0
273	M	C	NH	A	N	Y	0	0	0	1	0	0
274	F	C	NH	A	N	Y	0	0	1	0	0	0
275	F	C	NH	A	N	Y	0	1	0	1	0	0
276	M	C	NH	A	N	Y	0	1	1	1	0	0
277	M	C	NH	A	N	Y	0	0	0	1	0	1
278	M	C	NH	A	N	Y	0	0	0	1	0	0
279	F	C	NH	A	N	Y	0	0	0	1	0	0
280	F	C	NH	A	N	Y	0	0	1	1	0	0
281	F	C	NH	A	N	Y	0	0	0	1	0	0
282	F	C	NH	A	N	Y	0	0	1	1	0	0
283	F	C	NH	A	N	Y	0	0	1	1	0	0
284	M	C	NH	A	N	Y	0	0	1	1	0	0
285	M	C	NH	A	N	Y	0	1	0	0	0	0
286	F	C	NH	A	N	Y	0	0	0	1	0	0
287	M	C	NH	A	N	Y	0	0	0	0	1	0
288	F	C	NH	A	N	Y	0	1	0	1	0	0
289	M	C	NH	N	N	Y	0	0	1	1	0	0
290	F	C	NH	N	N	Y	0	0	1	1	0	0
291	F	C	NH	N	N	Y	0	0	1	1	0	1
292	F	C	NH	N	N	Y	0	1	1	1	0	0
293	M	C	NH	N	N	Y	0	1	1	0	1	0
294	M	C	NH	N	N	Y	0	1	1	1	0	0
295	F	C	NH	N	N	Y	0	1	1	0	1	0
296	M	C	NH	N	N	Y	0	0	0	1	0	1
297	F	C	NH	N	N	Y	0	0	1	1	0	1
298	M	C	NH	N	N	Y	0	0	1	1	0	0
299	F	C	NH	N	N	Y	0	0	1	1	0	0
300	M	C	NH	N	N	Y	0	0	1	1	0	0
301	M	C	NH	N	N	Y	0	1	1	0	0	0
302	F	C	NH	N	N	Y	0	1	1	1	0	0
303	F	C	NH	N	N	Y	0	0	1	1	0	0
304	F	C	NH	N	N	Y	0	0	1	1	0	0
305	F	C	NH	N	N	Y	0	1	1	1	0	0
306	F	C	NH	N	N	Y	0	1	1	1	0	0
307	F	C	NH	N	N	Y	0	0	1	1	0	1
308	F	C	NH	N	N	Y	0	0	1	1	0	0
309	M	C	NH	N	N	Y	0	0	1	1	0	0
310	F	C	NH	N	N	Y	0	0	1	0	0	0
311	M	C	NH	N	N	Y	0	0	0	1	0	0
312	F	C	NH	N	N	Y	0	0	1	1	0	0
313	F	C	NH	N	N	Y	0	0	0	0	0	1
314	F	C	NH	N	N	Y	0	1	0	1	0	0
315	F	C	NH	N	N	Y	0	0	0	0	0	1
316	M	C	NH	N	N	Y	0	0	1	1	0	0
317	F	C	NH	N	N	Y	0	0	0	1	0	0
318	F	C	NH	N	N	Y	0	0	1	1	0	0
319	M	C	NH	N	N	Y	0	0	0	1	0	0
320	M	C	NH	N	N	Y	0	1	1	0	0	1
321	F	C	NH	N	N	Y	0	0	1	0	0	0
322	M	C	NH	N	N	Y	0	0	1	1	0	0
323	F	C	NH	N	N	Y	0	0	0	1	0	1
324	M	C	NH	N	N	Y	0	1	1	0	0	0
325	M	C	NH	N	N	Y	0	0	1	1	0	1
326	M	C	NH	N	N	Y	0	0	0	1	0	0
327	F	C	NH	N	N	Y	0	0	1	1	0	0
328	M	C	NH	N	N	Y	0	0	0	1	0	0
329	F	C	NH	N	N	Y	0	0	1	0	0	0
330	M	C	NH	N	N	Y	0	1	1	1	0	1
331	F	C	NH	N	N	Y	0	1	1	0	0	0
332	F	C	NH	N	N	Y	0	1	0	1	0	0
333	F	C	NH	N	N	Y	0	1	1	1	0	0
334	M	C	NH	N	N	Y	0	0	0	1	0	0
335	F	C	H	A	Y	Y	0	0	1	1	0	0
336	M	C	H	A	Y	Y	0	0	0	1	0	0
337	F	C	H	A	Y	Y	0	0	0	1	0	0
338	F	C	H	A	Y	Y	0	1	1	0	0	0
339	M	C	H	A	Y	Y	1	0	0	0	1	0
340	F	C	H	A	Y	Y	0	0	0	1	0	1
341	M	C	H	A	Y	Y	1	0	0	0	0	0
342	M	C	H	A	Y	Y	0	0	1	1	0	0
343	F	C	H	A	Y	Y	0	0	1	1	0	0
344	F	C	H	A	Y	Y	0	0	1	1	0	0
345	F	C	H	A	Y	Y	0	0	1	1	0	0
346	M	C	H	A	Y	Y	1	0	0	1	0	0
347	F	C	H	A	Y	Y	0	1	1	0	0	0
348	M	C	H	A	Y	Y	0	0	0	1	0	0
349	M	C	H	A	Y	Y	0	0	1	1	0	0
350	F	C	H	N	Y	Y	0	0	1	1	0	0
351	M	C	H	N	Y	Y	0	0	1	1	1	0
352	F	C	H	N	Y	Y	0	0	0	1	0	0
353	F	C	H	N	Y	Y	0	0	1	0	0	0
354	F	C	H	N	Y	Y	0	0	0	0	1	1
355	M	C	H	N	Y	Y	0	0	1	0	0	0
356	F	C	H	N	Y	Y	0	0	1	1	0	0
357	M	C	H	N	Y	Y	1	0	1	1	0	0
358	F	C	H	N	Y	Y	1	0	0	1	0	0
359	M	C	H	N	Y	Y	0	0	1	1	0	0
360	M	C	H	N	Y	Y	0	0	1	1	0	0
361	F	C	NH	A	Y	Y	1	0	0	0	1	1
362	M	C	NH	A	Y	Y	0	0	1	1	0	0
363	M	C	NH	A	Y	Y	0	0	1	1	0	0
364	M	C	NH	A	Y	Y	0	0	1	1	0	0
365	M	C	NH	A	Y	Y	0	0	1	1	0	0
366	F	C	NH	A	Y	Y	0	0	1	0	0	0
367	F	C	NH	A	Y	Y	0	0	0	1	0	0
368	F	C	NH	A	Y	Y	0	0	1	1	0	0
369	M	C	NH	N	Y	Y	0	0	1	1	0	0
370	F	C	NH	N	Y	Y	0	1	1	1	0	0
371	M	C	NH	N	Y	Y	0	0	1	1	0	0
372	M	C	NH	N	Y	Y	0	0	1	1	0	0
373	M	C	NH	N	Y	Y	0	1	1	0	0	1
374	M	C	NH	N	Y	Y	0	0	0	1	0	0
375	F	C	NH	N	Y	Y	0	1	1	1	0	0
376	F	C	NH	N	Y	Y	0	0	1	1	0	0
377	F	C	NH	N	Y	Y	0	0	1	0	0	0
378	F	C	NH	N	Y	Y	0	0	1	1	0	0
379	M	C	NH	N	Y	Y	0	0	1	1	0	0
380	M	C	NH	N	Y	Y	0	0	1	1	0	0
381	F	L	H	A	M	IDK	1	0	0	1	1	0
382	F	L	H	A	N	IDK	0	0	1	0	1	0
383	F	L	H	A	N	IDK	0	0	0	1	1	0
384	M	L	H	A	N	IDK	0	0	1	1	0	0
385	F	L	H	A	N	IDK	0	0	0	1	1	0
386	M	L	H	A	N	IDK	0	0	0	1	0	0
387	F	L	H	A	N	IDK	0	0	0	1	0	0
388	M	L	H	A	N	IDK	0	0	1	1	0	0
389	F	L	H	A	N	IDK	0	0	0	0	0	0
390	M	L	H	N	N	IDK	0	0	0	1	0	0
391	F	L	H	N	N	IDK	0	0	0	1	0	0
392	F	L	H	N	N	IDK	0	1	1	0	0	0
393	M	L	H	N	N	IDK	0	0	0	1	0	0
394	M	L	H	N	N	IDK	0	0	0	1	0	0
395	M	L	H	N	N	IDK	1	0	0	0	0	0
396	F	L	H	N	N	IDK	0	0	0	1	0	1
397	F	L	H	N	N	IDK	0	0	1	1	0	0
398	F	L	H	N	N	IDK	1	0	0	0	0	0
399	F	L	H	N	N	IDK	0	0	1	1	0	0
400	F	L	H	N	N	IDK	1	0	0	0	1	0
401	M	L	H	N	N	IDK	0	0	0	1	0	0
402	F	L	H	N	N	IDK	1	0	0	0	0	0
403	M	L	H	N	N	IDK	1	0	0	1	0	0
404	M	L	H	N	N	IDK	0	0	0	1	0	0
405	F	L	NH	A	N	IDK	0	1	0	1	0	0
406	F	L	NH	A	N	IDK	0	0	1	0	0	0
407	M	L	NH	A	N	IDK	0	0	0	0	1	0
408	F	L	NH	A	N	IDK	1	0	0	1	1	0
409	F	L	NH	A	N	IDK	0	1	0	1	0	1
410	F	L	NH	A	N	IDK	0	0	0	1	0	0
411	F	L	NH	A	N	IDK	0	0	1	1	0	0
412	F	L	NH	A	N	IDK	0	0	1	1	0	0
413	F	L	NH	A	N	IDK	0	0	0	0	1	0
414	F	L	NH	A	N	IDK	0	1	1	0	0	0
415	F	L	NH	A	N	IDK	0	0	0	1	0	0
416	F	L	NH	A	N	IDK	0	0	1	1	0	0
417	F	L	NH	A	N	IDK	0	0	0	0	0	0
418	F	L	NH	A	N	IDK	0	0	1	1	0	0
419	M	L	NH	A	N	IDK	0	0	0	1	0	0
420	M	L	NH	A	N	IDK	0	0	0	1	0	0
421	F	L	NH	N	N	IDK	0	0	1	1	0	0
422	F	L	NH	N	N	IDK	0	0	1	1	0	1
423	F	L	NH	N	N	IDK	0	1	0	0	0	0
424	F	L	NH	N	N	IDK	0	0	1	1	0	1
425	F	L	NH	N	N	IDK	0	0	1	0	1	0
426	M	L	NH	N	N	IDK	0	0	0	0	0	1
427	F	L	NH	N	N	IDK	0	0	1	1	0	0
428	F	L	NH	N	N	IDK	0	0	0	0	0	1
429	M	L	NH	N	N	IDK	0	0	0	1	0	0
430	F	L	NH	N	N	IDK	0	0	1	1	0	0
431	F	L	NH	N	N	IDK	1	0	0	1	0	0
432	M	L	NH	N	N	IDK	0	0	0	1	0	1
433	M	L	NH	N	N	IDK	0	0	1	0	0	0
434	F	L	NH	N	N	IDK	0	0	1	1	0	1
435	F	L	NH	N	N	IDK	0	0	1	1	0	0
436	M	L	NH	N	N	IDK	0	0	0	1	0	0
437	M	L	NH	N	N	IDK	0	0	1	1	0	0
438	F	L	NH	N	N	IDK	0	0	1	1	0	1
439	F	L	H	A	Y	IDK	1	0	0	0	1	0
440	F	L	H	A	Y	IDK	0	1	0	0	0	0
441	M	L	H	A	Y	IDK	1	0	0	1	0	0
442	M	L	H	N	Y	IDK	0	0	1	0	1	0
443	M	L	H	N	Y	IDK	0	0	1	1	0	0
444	F	L	H	N	Y	IDK	0	0	1	1	0	0
445	M	L	NH	A	Y	IDK	1	0	1	0	0	0
446	M	L	NH	A	Y	IDK	0	0	0	1	0	0
447	F	L	NH	N	Y	IDK	0	1	1	1	0	0
448	F	L	NH	N	M	N	0	0	0	1	0	1
449	F	L	H	A	N	N	1	0	0	0	0
450	M	L	H	A	N	N	0	0	0	0	0	0
451	M	L	H	A	N	N	0	0	0	0	0	0
452	F	L	H	A	N	N	1	0	1	0	0	0
453	M	L	H	A	N	N	0	0	0	1	0	0
454	M	L	H	A	N	N	1	0	0	0	1	0
455	M	L	H	A	N	N	0	1	0	1	0	0
456	F	L	H	A	N	N	1	0	0	1	0	0
457	F	L	H	A	N	N	0	0	0	0	0	0
458	M	L	H	A	N	N	0	0	0	1	0	0
459	M	L	H	A	N	N	0	0	0	1	1	0
460	F	L	H	N	N	N	0	0	1	1	0	0
461	F	L	H	N	N	N	0	1	1	1	0	0
462	M	L	H	N	N	N	0	0	0	0	0	0
463	M	L	H	N	N	N	1	0	0	0	1	0
464	M	L	NH	A	N	N	0	0	1	0	1	0
465	F	L	NH	A	N	N	1	0	0	0	1	0
466	M	L	NH	A	N	N	1	0	0	0	0	0
467	F	L	NH	A	N	N	0	0	0	1	0	0
468	F	L	NH	A	N	N	0	0	1	1	0	0
469	F	L	NH	A	N	N	0	0	1	1	0	0
470	M	L	NH	A	N	N	0	0	1	1	0	0
471	M	L	NH	N	N	N	0	0	0	1	0	0
472	M	L	NH	N	N	N	1	0	0	1	0	0
473	M	L	NH	N	N	N	1	0	0	0	0	0
474	F	L	NH	N	N	N	0	0	0	1	0	1
475	M	L	NH	N	N	N	0	1	0	1	0	0
476	F	L	NH	N	N	N	1	0	0	0	1	0
477	F	L	NH	N	N	N	0	0	1	1	0	1
478	M	L	NH	N	N	N	1	0	0	0	0	0
479	F	L	H	A	Y	N	0	0	1	1	0	0
480	F	L	H	A	Y	N	0	0	0	0	1	0
481	F	L	H	A	Y	N	1	0	0	0	0	0
482	M	L	H	A	Y	N	1	0	0	1	0	0
483	M	L	H	A	Y	N	1	0	0	0	1	0
484	M	L	H	A	Y	N	1	0	0	0	1	0
485	F	L	H	A	Y	N	0	0	0	1	0	1
486	M	L	H	N	Y	N	0	0	0	1	0	0
487	F	L	NH	A	Y	N	0	0	1	1	0	0
488	F	L	NH	N	Y	N	0	0	1	0	0	0
489	M	L	H	A	M	Y	0	0	1	1	0	0
490	F	L	H	N	M	Y	0	0	1	1	0	0
491	F	L	H	N	M	Y	1	0	0	0	0	0
492	F	L	NH	A	M	Y	0	0	0	1	0	1
493	F	L	NH	N	M	Y	0	0	0	1	0	0
494	F	L	NH	N	M	Y	0	0	1	1	0	0
495	M	L	H	A	N	Y	0	0	1	1	0	1
496	F	L	H	A	N	Y	0	0	0	0	0	0
497	F	L	H	A	N	Y	0	0	0	0	0	1
498	M	L	H	A	N	Y	0	0	0	1	0	1
499	F	L	H	A	N	Y	0	0	0	0	1	1
500	F	L	H	A	N	Y	0	0	1	1	0	0
501	F	L	H	A	N	Y	0	0	1	0	1	0
502	F	L	H	A	N	Y	0	0	0	1	0	1
503	F	L	H	A	N	Y	1	0	0	0	1	0
504	F	L	H	A	N	Y	0	0	0	1	1	0
505	M	L	H	A	N	Y	0	1	0	0	0	0
506	F	L	H	A	N	Y	1	0	0	0	0	0
507	F	L	H	A	N	Y	0	1	1	1	0	0
508	M	L	H	A	N	Y	0	0	0	1	1	0
509	M	L	H	A	N	Y	0	0	0	1	0	0
510	F	L	H	A	N	Y	0	0	0	1	0	0
511	M	L	H	A	N	Y	0	0	0	0	0	0
512	F	L	H	A	N	Y	1	0	0	0	0	0
513	F	L	H	A	N	Y	1	0	1	0	0	0
514	F	L	H	A	N	Y	0	0	1	0	0	1
515	F	L	H	A	N	Y	1	0	0	0	0	0
516	M	L	H	A	N	Y	0	0	1	0	0	0
517	M	L	H	A	N	Y	1	0	0	1	0	0
518	F	L	H	A	N	Y	1	0	0	0	1	0
519	F	L	H	A	N	Y	0	0	0	1	0	0
520	F	L	H	A	N	Y	0	0	0	1	0	0
521	F	L	H	A	N	Y	1	0	0	0	0	0
522	F	L	H	A	N	Y	0	0	0	0	1	1
523	F	L	H	A	N	Y	0	0	0	1	0	0
524	M	L	H	A	N	Y	0	0	1	0	0	0
525	F	L	H	A	N	Y	0	0	1	1	0	0
526	F	L	H	A	N	Y	0	0	1	1	0	0
527	M	L	H	A	N	Y	0	0	1	0	0	0
528	M	L	H	A	N	Y	0	0	0	1	0	0
529	M	L	H	A	N	Y	0	0	1	1	0	0
530	F	L	H	A	N	Y	0	0	0	1	0	0
531	F	L	H	A	N	Y	0	0	1	1	0	0
532	F	L	H	A	N	Y	0	0	1	1	0	0
533	F	L	H	A	N	Y	0	0	0	0	0	0
534	M	L	H	A	N	Y	0	0	0	1	0	1
535	F	L	H	A	N	Y	0	0	0	1	0	0
536	F	L	H	A	N	Y	1	0	0	1	0	0
537	F	L	H	A	N	Y	0	0	1	0	1	0
538	F	L	H	A	N	Y	0	0	0	1	0	0
539	F	L	H	A	N	Y	0	0	1	1	0	0
540	F	L	H	A	N	Y	0	0	0	1	0	0
541	F	L	H	A	N	Y	1	0	0	0	0	0
542	F	L	H	A	N	Y	0	0	1	0	0	0
543	F	L	H	A	N	Y	0	0	0	1	0	0
544	F	L	H	A	N	Y	0	0	0	0	0	1
545	F	L	H	N	N	Y	1	0	0	0	1	1
546	F	L	H	N	N	Y	0	0	0	1	0	0
547	M	L	H	N	N	Y	0	0	1	0	1	0
548	F	L	H	N	N	Y	0	0	1	1	0	0
549	F	L	H	N	N	Y	0	0	1	0	0	1
550	M	L	H	N	N	Y	0	0	0	0	0	0
551	F	L	H	N	N	Y	0	0	1	0	0	0
552	M	L	H	N	N	Y	0	0	1	1	0	0
553	F	L	H	N	N	Y	0	0	1	1	0	0
554	F	L	H	N	N	Y	0	1	1	0	0	0
555	M	L	H	N	N	Y	0	0	1	1	0	1
556	M	L	H	N	N	Y	0	0	1	1	0	0
557	F	L	H	N	N	Y	1	0	0	0	0	0
558	F	L	H	N	N	Y	0	0	1	1	0	0
559	F	L	H	N	N	Y	0	0	0	1	1	0
560	F	L	H	N	N	Y	0	0	1	1	1	0
561	F	L	H	N	N	Y	0	0	0	1	1	0
562	M	L	H	N	N	Y	0
563	M	L	H	N	N	Y	0	0	0	1	0	0
564	F	L	H	N	N	Y	0	0	1	1	0	0
565	F	L	H	N	N	Y	0	0	1	1	0	0
566	M	L	H	N	N	Y	0	0	0	0	0	0
567	M	L	H	N	N	Y	0	0	1	1	0	0
568	M	L	H	N	N	Y	1	0	0	1	0	0
569	F	L	H	N	N	Y	0	0	1	1	0	0
570	F	L	H	N	N	Y	1	0	0	1	0	0
571	M	L	H	N	N	Y	1	0	0	0	0	0
572	F	L	H	N	N	Y	0	0	1	1	0	0
573	F	L	H	N	N	Y	0	0	0	1	0	0
574	F	L	H	N	N	Y	0	0	1	1	0	0
575	F	L	H	N	N	Y	0	0	1	1	0	0
576	M	L	H	N	N	Y	0	0	0	1	0	0
577	F	L	H	N	N	Y	0	0	1	1	0	0
578	F	L	H	N	N	Y	0	0	1	0	0	0
579	M	L	H	N	N	Y	0	0	0	1	0	0
580	F	L	H	N	N	Y	0	0	0	1	1	0
581	M	L	H	N	N	Y	0	0	1	0	0	1
582	F	L	H	N	N	Y	0	0	1	1	0	0
583	F	L	H	N	N	Y	1	0	0	1	0	0
584	F	L	H	N	N	Y	0	1	1	0	0	0
585	F	L	H	N	N	Y	1	0	0	1	0	0
586	M	L	H	N	N	Y	0	0	1	1	0	0
587	F	L	H	N	N	Y	0	0	1	1	0	0
588	F	L	H	N	N	Y	0	0	0	1	1	0
589	M	L	H	N	N	Y	0	0	1	0	1	0
590	F	L	H	N	N	Y	0	0	1	1	0	0
591	F	L	H	N	N	Y	0	0	0	1	0	1
592	F	L	H	N	N	Y	0	0	1	1	0	0
593	M	L	H	N	N	Y	1	0	0	0	0	0
594	M	L	H	N	N	Y	1	0	0	0	0	0
595	M	L	H	N	N	Y	1	0	0	1	0	0
596	F	L	H	N	N	Y	0	1	1	1	0	0
597	F	L	H	N	N	Y	0	0	1	0	0	0
598	M	L	H	N	N	Y	0	0	0	1	0	0
599	F	L	H	N	N	Y	0	0	0	1	1	0
600	F	L	H	N	N	Y	0	0	1	1	0	0
601	M	L	H	N	N	Y	0	0	1	1	0	0
602	F	L	NH	A	N	Y	0	0	0	0	0	0
603	M	L	NH	A	N	Y	0	0	1	1	0	0
604	F	L	NH	A	N	Y	0	1	1	0	0	0
605	F	L	NH	A	N	Y	0	0	1	0	0	0
606	F	L	NH	A	N	Y	0	0	0	1	0	0
607	F	L	NH	A	N	Y	0	0	0	1	0	0
608	M	L	NH	A	N	Y	0	0	0	1	0	0
609	F	L	NH	A	N	Y	0	0	1	1	0	0
610	F	L	NH	A	N	Y	0	0	1	1	0	0
611	F	L	NH	A	N	Y	0	0	0	1	0	0
612	M	L	NH	A	N	Y	0	0	0	1	1	0
613	M	L	NH	A	N	Y	0	1	1	0	0	0
614	M	L	NH	A	N	Y	0	0	1	1	0	0
615	F	L	NH	A	N	Y	0	0	1	1	0	0
616	F	L	NH	A	N	Y	0	1	0	0	0	1
617	F	L	NH	A	N	Y	0	0	1	0	0	0
618	F	L	NH	A	N	Y	0	0	1	1	0	0
619	F	L	NH	A	N	Y	1	0	0	0	0	0
620	M	L	NH	A	N	Y	0	0	0	1	0	0
621	M	L	NH	A	N	Y	0	1	1	1	0	0
622	F	L	NH	A	N	Y	0	0	0	1	0	0
623	F	L	NH	A	N	Y	0	0	1	0	0	0
624	F	L	NH	A	N	Y	0	0	0	1	0	0
625	M	L	NH	A	N	Y	0	0	1	1	0	0
626	F	L	NH	A	N	Y	0	1	0	1	0	0
627	F	L	NH	A	N	Y	0	0	1	1	0	0
628	F	L	NH	A	N	Y	0	0	0	1	0	0
629	F	L	NH	A	N	Y	0	0	1	1	0	1
630	M	L	NH	A	N	Y	1	0	0	1	1	0
631	M	L	NH	A	N	Y	0	0	1	1	0	0
632	M	L	NH	A	N	Y	0	0	0	1	0	0
633	M	L	NH	A	N	Y	1	0	0	1	0	0
634	F	L	NH	A	N	Y	0	0	1	1	0	0
635	F	L	NH	A	N	Y	0	0	1	0	0	0
636	M	L	NH	A	N	Y	0	0	0	1	1	0
637	F	L	NH	A	N	Y	0	0	1	0	0	0
638	F	L	NH	A	N	Y	0	0	1	1	0	0
639	F	L	NH	A	N	Y	0	0	1	0	0	0
640	F	L	NH	A	N	Y	0	0	1	1	0	0
641	F	L	NH	A	N	Y	0	0	1	0	0	1
642	F	L	NH	A	N	Y	0	0	1	1	0	1
643	M	L	NH	A	N	Y	0	0	1	1	0	0
644	F	L	NH	A	N	Y	0	0	0	1	0	0
645	F	L	NH	A	N	Y	0	0	0	0	1	0
646	M	L	NH	A	N	Y	0	0	0	1	0	0
647	F	L	NH	A	N	Y	0	0	1	0	0	0
648	F	L	NH	A	N	Y	0	1	1	0	0	0
649	M	L	NH	A	N	Y	0	0	0	1	0	0
650	F	L	NH	A	N	Y	0	0	1	1	0	0
651	M	L	NH	A	N	Y	1	0	0	1	0	0
652	F	L	NH	A	N	Y	0	0	1	1	0	0
653	F	L	NH	A	N	Y	0	0	0	1	0	0
654	F	L	NH	A	N	Y	0	0	1	0	0	0
655	M	L	NH	A	N	Y	0	0	1	0	1	0
656	F	L	NH	A	N	Y	0	0	1	0	0	0
657	F	L	NH	A	N	Y	0	1	0	0	0	0
658	F	L	NH	A	N	Y	0	0	1	1	0	0
659	F	L	NH	A	N	Y	0	0	1	1	0	0
660	F	L	NH	A	N	Y	0	0	1	1	0	1
661	F	L	NH	N	N	Y	0	1	1	0	0	0
662	F	L	NH	N	N	Y	0	0	1	0	1	0
663	M	L	NH	N	N	Y	0	0	0	1	1	0
664	F	L	NH	N	N	Y	1	0	0	1	0	0
665	F	L	NH	N	N	Y	0	0	1	1	0	0
666	M	L	NH	N	N	Y	0	0	0	1	0	1
667	F	L	NH	N	N	Y	0	0	0	1	0	1
668	F	L	NH	N	N	Y	0	0	1	1	0	0
669	F	L	NH	N	N	Y	0	1	1	0	0	0
670	M	L	NH	N	N	Y	0	0	0	1	0	0
671	M	L	NH	N	N	Y	0	0	1	1	0	1
672	F	L	NH	N	N	Y	0	0	1	1	0	0
673	F	L	NH	N	N	Y	0	0	1	1	1	0
674	F	L	NH	N	N	Y	1	0	1	0	1	0
675	M	L	NH	N	N	Y	1	0	0	0	1	0
676	F	L	NH	N	N	Y	0	0	1	1	0	0
677	M	L	NH	N	N	Y	0	0	1	1	0	0
678	F	L	NH	N	N	Y	0	0	1	1	0	1
679	M	L	NH	N	N	Y	0	0	1	0	0	1
680	M	L	NH	N	N	Y	0	0	1	1	0	0
681	M	L	NH	N	N	Y	0	0	1	1	0	1
682	F	L	NH	N	N	Y	0	0	1	1	0	0
683	F	L	NH	N	N	Y	0	0	1	1	0	0
684	F	L	NH	N	N	Y	0	0	0	1	0	0
685	F	L	NH	N	N	Y	0	0	1	0	0	1
686	M	L	NH	N	N	Y	0	0	0	1	0	0
687	F	L	NH	N	N	Y	1	0	0	0	1	0
688	M	L	NH	N	N	Y	0	1	0	1	0	0
689	F	L	NH	N	N	Y	0	1	0	0	0	0
690	F	L	NH	N	N	Y	0	0	0	1	0	0
691	M	L	NH	N	N	Y	0	0	1	1	0	0
692	M	L	NH	N	N	Y	0	1	1	1	0	0
693	F	L	NH	N	N	Y	0	0	1	0	0	0
694	F	L	NH	N	N	Y	0	0	1	1	0	0
695	F	L	NH	N	N	Y	1	0	0	0	1	0
696	F	L	NH	N	N	Y	0	0	1	0	0	0
697	F	L	NH	N	N	Y	1	0	0	0	1	0
698	F	L	NH	N	N	Y	0	1	1	1	0	0
699	M	L	NH	N	N	Y	0	0	1	1	0	0
700	F	L	NH	N	N	Y	0	1	1	1	0	0
701	M	L	NH	N	N	Y	0	0	0	1	0	0
702	M	L	NH	N	N	Y	0	0	1	1	0	0
703	M	L	NH	N	N	Y	0	0	1	1	0	0
704	M	L	NH	N	N	Y	0	0	1	1	0	1
705	F	L	NH	N	N	Y	0	0	0	1	0	0
706	M	L	NH	N	N	Y	0	0	1	0	0	0
707	F	L	NH	N	N	Y	0	0	0	1	0	0
708	F	L	NH	N	N	Y	0	0	1	1	0	0
709	F	L	NH	N	N	Y	0	0	1	0	0	0
710	M	L	NH	N	N	Y	0	0	0	1	0	0
711	F	L	NH	N	N	Y	0	0	1	1	0	0
712	F	L	NH	N	N	Y	0	0	1	1	0	0
713	F	L	NH	N	N	Y	0	0	1	1	0	0
714	F	L	NH	N	N	Y	0	0	0	1	1	0
715	F	L	NH	N	N	Y	0	0	1	1	0	0
716	M	L	H	A	Y	Y	1	0	0	1	0	0
717	M	L	H	A	Y	Y	1	0	0	0	0	0
718	M	L	H	A	Y	Y	1	0	0	0	1	0
719	M	L	H	A	Y	Y	1	0	0	0	0	0
720	F	L	H	A	Y	Y	1	0	0	0	0	0
721	F	L	H	A	Y	Y	0	0	0	0	0	0
722	M	L	H	A	Y	Y	0	0	1	1	0	1
723	M	L	H	A	Y	Y	0	0	1	1	0	0
724	F	L	H	A	Y	Y	0	0	0	1	1	0
725	F	L	H	A	Y	Y	0	0	0	1	0	0
726	M	L	H	A	Y	Y	0	0	1	1	0	0
727	F	L	H	A	Y	Y	0	0	0	1	0	0
728	M	L	H	A	Y	Y	1	0	1	0	0	0
729	M	L	H	N	Y	Y	0	0	1	1	0	0
730	F	L	H	N	Y	Y	1	0	0	0	1	0
731	M	L	H	N	Y	Y	0	0	0	1	0	0
732	M	L	H	N	Y	Y	1	0	0	1	0	0
733	M	L	H	N	Y	Y	0	0	0	1	0	0
734	M	L	H	N	Y	Y	1	0	0	0	1	0
735	F	L	H	N	Y	Y	1	0	0	0	0	0
736	F	L	H	N	Y	Y	0	0	1	0	0	0
737	M	L	H	N	Y	Y	1	0	0	0	1	0
738	F	L	H	N	Y	Y	0	0	0	1	0	0
739	M	L	H	N	Y	Y	1	0	1	0	0	1
740	M	L	H	N	Y	Y	0	0	0	0	0	0
741	F	L	H	N	Y	Y	0	0	0	0	1	0
742	F	L	NH	A	Y	Y	0	0	1	1	0	0
743	M	L	NH	A	Y	Y	0	1	1	1	0	0
744	F	L	NH	A	Y	Y	0	0	1	1	0	0
745	M	L	NH	A	Y	Y	0	0	0	1	0	0
746	M	L	NH	A	Y	Y	0	0	0	1	1	0
747	M	L	NH	A	Y	Y	0	0	1	1	0	0
748	F	L	NH	A	Y	Y	0	0	0	0	1	0
749	F	L	NH	A	Y	Y	0	0	1	1	0	0
750	M	L	NH	A	Y	Y	1	0	1	1	0	0
751	M	L	NH	N	Y	Y	0	0	0	1	0	1
752	F	L	NH	N	Y	Y	0	0	1	1	0	0
753	F	L	NH	N	Y	Y	0	0	1	1	0	1
754	M	L	NH	N	Y	Y	0	0	0	1	0	1
755	F	L	NH	N	Y	Y	1	0	0	0	0	0
756	M	L	NH	N	Y	Y	1	0	0	1	0	0
757	F	L	NH	N	Y	Y	0	1	1	0	0	0
758	M	L	NH	N	Y	Y	0	0	1	1	0	0
759	F	L	NH	N	Y	Y	0	0	0	1	0	0
760	M	L	NH	N	Y	Y	1	0	0	1	1	0
761	M	S	H	A	N	IDK	0	0	0	1	1	0
762	F	S	H	A	N	IDK	0	0	0	0	1	0
763	F	S	H	A	N	IDK	1	0	0	0	1	0
764	F	S	H	A	N	IDK	1	0	1	1	0	0
765	M	S	H	A	N	IDK	0	0	0	1	0	0
766	F	S	H	A	N	IDK	1	0	0	1	1	0
767	F	S	H	A	N	IDK	0	0	0	0	1	1
768	F	S	H	A	N	IDK	0	0	0	0	0	1
769	M	S	H	A	N	IDK	1	0	0	0	0	0
770	M	S	H	A	N	IDK	1	0	0	0	0	0
771	F	S	H	A	N	IDK	0	0	0	1	0	0
772	F	S	H	N	N	IDK	1	0	0	0	1	0
773	F	S	H	N	N	IDK	1	0	0	0	1	1
774	F	S	H	N	N	IDK	1	0	0	1	0	0
775	M	S	H	N	N	IDK	0	0	1	1	0	0
776	F	S	H	N	N	IDK	0	0	1	0	1	0
777	F	S	H	N	N	IDK	0	0	0	1	0	1
778	M	S	H	N	N	IDK	0	1	0	0	0	0
779	M	S	H	N	N	IDK	1	0	0	0	1	0
780	F	S	H	N	N	IDK	1	0	1	1	0	0
781	M	S	H	N	N	IDK	0	0	0	1	0	0
782	F	S	H	N	N	IDK	1	0	0	1	0	0
783	F	S	H	N	N	IDK	1	0	0	0	0	1
784	M	S	H	N	N	IDK	1	0	0	0	0	0
785	F	S	H	N	N	IDK	1	0	0	0	1	0
786	F	S	H	N	N	IDK	0	0	0	1	0	0
787	F	S	H	N	N	IDK	0	0	0	1	0	0
788	M	S	H	N	N	IDK	0	0	1	1	0	0
789	M	S	H	N	N	IDK	0	0	0	1	0	0
790	F	S	NH	A	N	IDK	1	0	0	0	0	0
791	F	S	NH	A	N	IDK	0	0	0	1	0	0
792	F	S	NH	A	N	IDK	0	0	0	0	0	0
793	M	S	NH	A	N	IDK	1	0	0	0	0	0
794	F	S	NH	A	N	IDK	0	0	0	1	1	0
795	F	S	NH	A	N	IDK	0	0	1	0	0	0
796	F	S	NH	A	N	IDK	0	0	1	1	0	0
797	M	S	NH	A	N	IDK	0	0	0	1	0	0
798	F	S	NH	A	N	IDK	0	0	1	1	0	0
799	F	S	NH	A	N	IDK	0	0	1	1	0	0
800	F	S	NH	A	N	IDK	0	0	1	0	0	0
801	F	S	NH	A	N	IDK	1	0	0	1	0	0
802	F	S	NH	A	N	IDK	0	0	0	1	0	0
803	M	S	NH	A	N	IDK	0	0	1	1	0	0
804	M	S	NH	A	N	IDK	1	0	0	0	1	0
805	F	S	NH	A	N	IDK	0	0	0	0	0	0
806	F	S	NH	N	N	IDK	0	1	0	1	0	0
807	M	S	NH	N	N	IDK	1	0	0	0	0	0
808	M	S	NH	N	N	IDK	0	0	1	1	0	0
809	M	S	NH	N	N	IDK	0	0	1	1	0	1
810	M	S	NH	N	N	IDK	0	0	1	1	0	0
811	F	S	NH	N	N	IDK	0	0	0	1	0	0
812	M	S	NH	N	N	IDK	0	0	1	0	1	1
813	F	S	NH	N	N	IDK	0	0	1	0	0	1
814	M	S	NH	N	N	IDK	0	0	0	1	0	0
815	M	S	NH	N	N	IDK	0	0	0	1	0	0
816	F	S	NH	N	N	IDK	0	0	0	1	0	0
817	F	S	NH	N	N	IDK	0	0	1	1	0	0
818	F	S	NH	N	N	IDK	0	0	0	0	0	0
819	F	S	NH	N	N	IDK	0	0	0	1	1	0
820	F	S	NH	N	N	IDK	0	0	1	0	0	0
821	F	S	NH	N	N	IDK	1	0	0	1	0	0
822	F	S	NH	N	N	IDK	0	0	1	1	0	0
823	F	S	NH	N	N	IDK	0	0	1	1	0	0
824	M	S	H	N	Y	IDK	0	0	1	1	0	1
825	F	S	H	N	Y	IDK	1	0	0	1	0	0
826	M	S	H	N	Y	IDK	1	0	0	0	0	0
827	M	S	NH	A	Y	IDK	1	0	0	0	0	0
828	F	S	NH	A	Y	IDK	0	0	1	1	0	0
829	F	S	NH	A	Y	IDK	1	0	0	0	0	0
830	F	S	NH	A	Y	IDK	1	0	0	0	0	1
831	M	S	NH	A	Y	IDK	0	0	0	1	0	0
832	M	S	NH	N	Y	IDK	0	0	1	1	0	0
833	M	S	NH	N	Y	IDK	0	0	0	1	1	1
834	M	S	H	N	M	N	1	0	0	0	0	0
835	F	S	H	A	N	N	0	0	1	1	0	0
836	M	S	H	A	N	N	0	0	0	0	0	0
837	M	S	H	A	N	N	0	0	1	1	0	0
838	F	S	H	A	N	N	1	0	0	0	0	0
839	M	S	H	A	N	N	1	0	0	0	0	0
840	F	S	H	A	N	N	0	0	1	1	0	1
841	M	S	H	N	N	N	0	1	1	1	0	0
842	F	S	H	N	N	N	0	0	1	1	1	0
843	F	S	H	N	N	N	0	0	0	1	1	0
844	F	S	H	N	N	N	0	0	1	1	0	0
845	F	S	H	N	N	N	0	0	1	1	0	0
846	F	S	H	N	N	N	1	0	0	1	0	0
847	M	S	H	N	N	N	0	0	0	1	0	0
848	F	S	H	N	N	N	1	0	0	0	1	0
849	F	S	H	N	N	N	1	0	0	0	1	0
850	M	S	H	N	N	N	1	0	0	0	0	0
851	F	S	H	N	N	N	0	0	0	1	0	0
852	F	S	NH	A	N	N	1	0	0	0	1	0
853	M	S	NH	A	N	N	0	0	0	1	0	0
854	M	S	NH	N	N	N	0	0	1	1	0	0
855	F	S	NH	N	N	N	0	1	0	0	1	0
856	F	S	NH	N	N	N	1	0	0	1	0	0
857	M	S	NH	N	N	N	0	0	0	1	0	0
858	F	S	NH	N	N	N	0	0	1	1	0	0
859	F	S	NH	N	N	N	0	0	1	1	0	0
860	M	S	H	A	Y	N	0	1	0	1	0	0
861	F	S	H	A	Y	N	0	0	0	1	0	0
862	F	S	H	A	Y	N	0	0	0	1	0	0
863	F	S	H	A	Y	N	0	0	0	0	0	0
864	M	S	H	A	Y	N	0	0	0	1	0	0
865	F	S	H	A	Y	N	1	0	0	0	1	0
866	M	S	H	A	Y	N	1	0	0	1	1	0
867	M	S	H	A	Y	N	0	0	0	0	1	1
868	F	S	H	A	Y	N	0	0	0	1	1	0
869	F	S	H	N	Y	N	0	1	1	1	0	0
870	F	S	H	N	Y	N	1	0	0	0	0	0
871	F	S	H	N	Y	N	0	0	0	1	0	0
872	M	S	NH	A	Y	N	1	0	0	0	0	0
873	M	S	NH	A	Y	N	0	0	1	1	0	0
874	F	S	NH	A	Y	N	1	0	0	0	1	0
875	M	S	NH	N	Y	N	1	0	0	0	1	0
876	M	S	NH	N	Y	N	0	1	0	1	1	0
877	F	S	NH	N	Y	N	1	0	0	1	0	0
878	M	S	NH	N	Y	N	0	0	1	1	0	0
879	F	S	H	N	M	Y	0	0	0	1	0	0
880	M	S	H	N	M	Y	0	1	0	1	0	0
881	F	S	H	N	M	Y	1	0	0	1	0	0
882	F	S	NH	A	M	Y	1	0	0	0	0	1
883	M	S	NH	A	M	Y	0	0	1	0	0	0
884	F	S	NH	A	M	Y	1	0	1	0	0	0
885	M	S	NH	N	M	Y	0	0	1	1	0	0
886	F	S	NH	N	M	Y	0	1	1	1	0	0
887	F	S	NH	N	M	Y	0	0	1	1	0	1
888	F	S	H	A	N	Y	0	0	0	0	0	0
889	M	S	H	A	N	Y	0	0	1	1	0	0
890	F	S	H	A	N	Y	1	0	0	0	0	0
891	M	S	H	A	N	Y	0	0	1	0	0	0
892	F	S	H	A	N	Y	0	0	1	1	1	0
893	F	S	H	A	N	Y	0	1	1	1	0	1
894	M	S	H	A	N	Y	0	0	0	1	0	0
895	F	S	H	A	N	Y	0	0	0	0	0	0
896	F	S	H	A	N	Y	1	0	0	1	0	0
897	M	S	H	A	N	Y	1	0	0	0	1	0
898	F	S	H	A	N	Y	0	0	1	0	0	0
899	F	S	H	A	N	Y	0	0	1	1	0	0
900	F	S	H	A	N	Y	0	0	1	0	0	0
901	F	S	H	A	N	Y	0	0	0	1	0	0
902	F	S	H	A	N	Y	1	0	0	0	0	0
903	M	S	H	A	N	Y	1	0	0	0	1	0
904	M	S	H	A	N	Y	0	0	0	1	0	0
905	M	S	H	A	N	Y	0	0	1	1	0	0
906	M	S	H	A	N	Y	0	0	0	1	0	0
907	F	S	H	A	N	Y	1	0	0	0	0	0
908	M	S	H	A	N	Y	0	0	0	1	0	0
909	M	S	H	A	N	Y	1	0	0	1	0	0
910	F	S	H	A	N	Y	0	1	1	1	0	1
911	M	S	H	A	N	Y	1	0	0	0	0	0
912	M	S	H	A	N	Y	0	0	1	1	0	0
913	M	S	H	A	N	Y	0	0	1	0	0	0
914	F	S	H	A	N	Y	1	0	0	0	0	0
915	M	S	H	A	N	Y	0	0	0	1	0	0
916	F	S	H	A	N	Y	1	0	0	0	0	0
917	M	S	H	A	N	Y	1	0	0	0	1	0
918	F	S	H	A	N	Y	1	0	0	1	0	0
919	M	S	H	A	N	Y	0	1	0	0	0	0
920	F	S	H	A	N	Y	0	0	1	0	0	0
921	F	S	H	A	N	Y	0	0	0	1	0	0
922	M	S	H	A	N	Y	0	0	0	1	1	0
923	F	S	H	A	N	Y	0	0	0	0	0	0
924	F	S	H	A	N	Y	0	0	1	0	1	0
925	F	S	H	A	N	Y	0	0	1	1	0	0
926	F	S	H	A	N	Y	0	0	1	1	1	0
927	M	S	H	A	N	Y	0	0	1	1	0	1
928	F	S	H	A	N	Y	1	0	0	1	0	0
929	M	S	H	A	N	Y	0	0	0	1	0	0
930	M	S	H	A	N	Y	0	0	1	0	0	1
931	F	S	H	A	N	Y	0	0	1	1	0	0
932	F	S	H	A	N	Y	0	0	0	1	0	0
933	F	S	H	A	N	Y	0	0	0	1	0	0
934	F	S	H	A	N	Y	0	0	1	1	0	1
935	F	S	H	A	N	Y	1	0	0	0	0	0
936	M	S	H	A	N	Y	0	0	1	1	0	0
937	F	S	H	A	N	Y	0	0	1	1	0	0
938	F	S	H	A	N	Y	0	0	0	1	0	0
939	M	S	H	A	N	Y	0	0	1	1	0	1
940	F	S	H	A	N	Y	0	0	1	1	0	0
941	M	S	H	N	N	Y	1	0	0	0	1	0
942	F	S	H	N	N	Y	0	0	1	1	0	0
943	F	S	H	N	N	Y	0	0	0	1	0	0
944	M	S	H	N	N	Y	0	0	0	0	1	0
945	F	S	H	N	N	Y	1	0	0	0	1	0
946	M	S	H	N	N	Y	0	0	0	1	0	0
947	F	S	H	N	N	Y	0	1	0	1	0	0
948	F	S	H	N	N	Y	0	0	1	1	0	0
949	M	S	H	N	N	Y	1	0	0	1	0	0
950	F	S	H	N	N	Y	0	0	0	1	0	0
951	F	S	H	N	N	Y	0	0	1	1	0	1
952	F	S	H	N	N	Y	1	0	0	0	1	0
953	M	S	H	N	N	Y	0	0	1	1	0	0
954	F	S	H	N	N	Y	0	0	1	0	0	0
955	M	S	H	N	N	Y	1	0	0	0	0	0
956	F	S	H	N	N	Y	1	0	0	0	0	0
957	F	S	H	N	N	Y	0	0	0	1	0	0
958	F	S	H	N	N	Y	1	0	1	0	0	0
959	F	S	H	N	N	Y	1	0	0	1	1	0
960	M	S	H	N	N	Y	0	0	0	1	1	0
961	F	S	H	N	N	Y	1	0	0	1	0	0
962	F	S	H	N	N	Y	0	0	1	0	0	0
963	M	S	H	N	N	Y	0	1	1	0	0	0
964	F	S	H	N	N	Y	0	0	0	1	1	0
965	F	S	H	N	N	Y	0	0	0	1	0	0
966	F	S	H	N	N	Y	1	0	0	0	0	0
967	M	S	H	N	N	Y	0	0	0	0	0	0
968	F	S	H	N	N	Y	0	0	0	1	1	0
969	F	S	H	N	N	Y	0	0	1	1	0	0
970	F	S	H	N	N	Y	0	0	1	0	0	1
971	F	S	H	N	N	Y	0	0	0	1	1	0
972	F	S	H	N	N	Y	1	0	0	1	0	0
973	F	S	H	N	N	Y	1	0	0	0	0	0
974	F	S	H	N	N	Y	0	0	0	1	0	1
975	M	S	H	N	N	Y	0	0	0	1	0	0
976	M	S	H	N	N	Y	1	0	0	0	0	0
977	F	S	H	N	N	Y	0	0	1	1	1	0
978	M	S	H	N	N	Y	0	0	1	1	0	0
979	F	S	H	N	N	Y	0	0	1	1	0	0
980	F	S	H	N	N	Y	0	0	1	0	0	0
981	F	S	H	N	N	Y	0	0	1	1	0	0
982	F	S	H	N	N	Y	0	0	1	0	0	0
983	F	S	H	N	N	Y	0	0	0	1	0	0
984	F	S	H	N	N	Y	0	0	0	1	0	0
985	F	S	H	N	N	Y	0	0	1	1	0	1
986	F	S	H	N	N	Y	0	0	0	1	0	0
987	F	S	H	N	N	Y	1	0	1	1	0	0
988	F	S	H	N	N	Y	0	0	1	1	0	0
989	F	S	NH	A	N	Y	0	0	0	1	0	0
990	F	S	NH	A	N	Y	0	0	1	1	0	1
991	F	S	NH	A	N	Y	1	0	0	1	1	0
992	M	S	NH	A	N	Y	0	1	1	0	0	0
993	F	S	NH	A	N	Y	0	0	1	1	0	0
994	F	S	NH	A	N	Y	0	0	1	1	0	0
995	M	S	NH	A	N	Y	0	1	1	0	0	0
996	F	S	NH	A	N	Y	1	0	0	1	0	0
997	F	S	NH	A	N	Y	0	1	0	1	0	0
998	M	S	NH	A	N	Y	0	0	0	1	0	1
999	M	S	NH	A	N	Y	0	0	1	1	0	0
1000	F	S	NH	A	N	Y	0	0	0	1	0	0
1001	M	S	NH	A	N	Y	0	0	1	1	0	0
1002	F	S	NH	A	N	Y	0	1	0	0	0	1
1003	F	S	NH	A	N	Y	0	0	1	1	0	0
1004	F	S	NH	A	N	Y	1	0	0	1	0	0
1005	M	S	NH	A	N	Y	0	0	0	1	0	0
1006	F	S	NH	A	N	Y	0	0	0	0	0	0
1007	M	S	NH	A	N	Y	0	0	1	1	0	0
1008	F	S	NH	A	N	Y	0	0	0	1	0	0
1009	F	S	NH	A	N	Y	0	0	1	0	0	0
1010	F	S	NH	A	N	Y	0	0	0	1	0	0
1011	M	S	NH	A	N	Y	0	0	1	1	0	0
1012	F	S	NH	A	N	Y	0	0	0	1	0	0
1013	F	S	NH	A	N	Y	0	0	1	0	1	0
1014	F	S	NH	A	N	Y	0	0	1	0	0	1
1015	F	S	NH	A	N	Y	0	1	1	1	0	1
1016	M	S	NH	A	N	Y	0	1	1	1	0	0
1017	F	S	NH	A	N	Y	0	0	1	1	0	0
1018	F	S	NH	A	N	Y	0	1	1	0	0	0
1019	F	S	NH	A	N	Y	1	0	0	0	1	0
1020	F	S	NH	A	N	Y	0	0	0	0	1	0
1021	F	S	NH	A	N	Y	1	0	0	0	0	1
1022	M	S	NH	A	N	Y	0	0	1	0	0	1
1023	F	S	NH	A	N	Y	0	1	0	1	0	0
1024	F	S	NH	A	N	Y	1	0	0	0	0	0
1025	F	S	NH	A	N	Y	0	0	0	1	0	0
1026	F	S	NH	A	N	Y	0	0	1	1	0	0
1027	F	S	NH	A	N	Y	0	0	1	1	0	0
1028	M	S	NH	A	N	Y	0	0	0	1	0	0
1029	F	S	NH	A	N	Y	0	0	1	1	0	0
1030	F	S	NH	A	N	Y	0	0	1	1	0	0
1031	F	S	NH	A	N	Y	0	0	1	1	0	0
1032	M	S	NH	A	N	Y	0	0	1	1	0	0
1033	M	S	NH	A	N	Y	1	0	0	0	0	0
1034	F	S	NH	A	N	Y	0	1	1	1	0	0
1035	M	S	NH	A	N	Y	0	0	1	1	0	0
1036	F	S	NH	A	N	Y	0	0	1	0	0	0
1037	F	S	NH	A	N	Y	1	0	0	0	0	1
1038	F	S	NH	A	N	Y	0	0	1	1	0	0
1039	F	S	NH	A	N	Y	0	0	1	1	0	0
1040	F	S	NH	A	N	Y	0	0	1	1	0	0
1041	M	S	NH	A	N	Y	1	0	0	0	0	0
1042	F	S	NH	A	N	Y	0	0	0	1	0	0
1043	M	S	NH	A	N	Y	0	1	1	1	0	0
1044	F	S	NH	A	N	Y	0	1	1	1	0	0
1045	M	S	NH	N	N	Y	0	0	1	1	0	0
1046	F	S	NH	N	N	Y	0	1	1	0	0	0
1047	M	S	NH	N	N	Y	0	0	1	0	0	0
1048	F	S	NH	N	N	Y	0	0	1	1	0	0
1049	F	S	NH	N	N	Y	0	0	1	0	0	0
1050	F	S	NH	N	N	Y	0	0	1	0	1	0
1051	M	S	NH	N	N	Y	0	0	1	1	0	0
1052	F	S	NH	N	N	Y	0	0	1	1	0	1
1053	F	S	NH	N	N	Y	0	0	1	0	1	0
1054	M	S	NH	N	N	Y	0	0	1	1	0	0
1055	M	S	NH	N	N	Y	0	0	1	1	0	0
1056	M	S	NH	N	N	Y	0	0	1	1	0	0
1057	F	S	NH	N	N	Y	0	0	1	1	0	0
1058	M	S	NH	N	N	Y	0	1	1	1	0	0
1059	F	S	NH	N	N	Y	0	0	1	1	0	0
1060	M	S	NH	N	N	Y	0	0	0	0	1	0
1061	F	S	NH	N	N	Y	1	0	0	0	0	0
1062	F	S	NH	N	N	Y	0	0	1	0	0	1
1063	F	S	NH	N	N	Y	0	0	1	1	0	0
1064	F	S	NH	N	N	Y	0	1	0	1	0	0
1065	M	S	NH	N	N	Y	0	0	0	1	0	0
1066	M	S	NH	N	N	Y	0	0	1	0	0	0
1067	F	S	NH	N	N	Y	1	0	0	1	0	1
1068	F	S	NH	N	N	Y	0	0	1	1	0	0
1069	F	S	NH	N	N	Y	0	0	1	0	0	0
1070	M	S	NH	N	N	Y	0	1	0	1	0	0
1071	M	S	NH	N	N	Y	0	1	1	1	0	0
1072	F	S	NH	N	N	Y	1	0	0	1	0	0
1073	M	S	NH	N	N	Y	0	0	1	1	0	0
1074	F	S	NH	N	N	Y	0	1	1	1	0	0
1075	M	S	NH	N	N	Y	0	0	1	0	0	0
1076	M	S	NH	N	N	Y	0	0	1	0	0	1
1077	M	S	NH	N	N	Y	0	0	1	1	0	0
1078	M	S	NH	N	N	Y	0	0	1	1	0	0
1079	F	S	NH	N	N	Y	0	0	1	1	0	1
1080	F	S	NH	N	N	Y	0	0	1	1	0	1
1081	M	S	NH	N	N	Y	0	0	1	0	0	1
1082	F	S	NH	N	N	Y	0	0	1	1	0	0
1083	M	S	NH	N	N	Y	0	1	1	0	0	0
1084	F	S	NH	N	N	Y	0	0	1	1	0	0
1085	M	S	NH	N	N	Y	1	0	0	0	0	0
1086	M	S	NH	N	N	Y	0	0	1	1	0	0
1087	M	S	NH	N	N	Y	0	1	1	0	0	0
1088	M	S	NH	N	N	Y	0	0	1	1	0	0
1089	F	S	NH	N	N	Y	0	0	0	1	0	0
1090	F	S	NH	N	N	Y	0	0	1	0	0	0
1091	F	S	NH	N	N	Y	0	1	1	0	0	1
1092	M	S	NH	N	N	Y	0	0	1	1	0	0
1093	M	S	NH	N	N	Y	1	0	0	0	0	0
1094	F	S	NH	N	N	Y	0	0	1	1	0	0
1095	F	S	H	A	Y	Y	1	0	0	0	0	0
1096	M	S	H	A	Y	Y	1	0	0	1	1	0
1097	F	S	H	A	Y	Y	1	0	0	1	0	0
1098	F	S	H	A	Y	Y	1	0	0	1	0	0
1099	M	S	H	A	Y	Y	0	0	0	1	0	1
1100	M	S	H	A	Y	Y	0	0	0	1	0	0
1101	M	S	H	A	Y	Y	0	0	0	1	0	0
1102	F	S	H	A	Y	Y	0	1	1	0	0	0
1103	F	S	H	A	Y	Y	0	0	0	1	1	0
1104	F	S	H	A	Y	Y	0	0	0	1	0	0
1105	F	S	H	A	Y	Y	0	0	0	0	1	1
1106	F	S	H	A	Y	Y	1	0	0	0	1	0
1107	M	S	H	A	Y	Y	0	0	1	1	0	1
1108	F	S	H	A	Y	Y	0	0	0	1	1	0
1109	F	S	H	A	Y	Y	0	0	1	1	0	0
1110	F	S	H	A	Y	Y	0	0	1	1	0	0
1111	F	S	H	N	Y	Y	0	0	1	1	0	0
1112	M	S	H	N	Y	Y	1	0	0	0	1	0
1113	F	S	H	N	Y	Y	0	0	1	1	0	0
1114	M	S	H	N	Y	Y	1	0	0	1	0	0
1115	F	S	H	N	Y	Y	0	0	0	0	1	0
1116	M	S	H	N	Y	Y	1	0	0	0	0	0
1117	F	S	H	N	Y	Y	0	1	0	0	0	0
1118	F	S	H	N	Y	Y	1	0	0	0	0	0
1119	F	S	H	N	Y	Y	1	0	0	1	0	0
1120	M	S	H	N	Y	Y	0	0	0	1	1	0
1121	M	S	NH	A	Y	Y	0	1	0	1	1	0
1122	F	S	NH	A	Y	Y	0	0	1	1	0	0
1123	F	S	NH	A	Y	Y	0	0	0	1	1	0
1124	M	S	NH	A	Y	Y	0	0	0	1	0	0
1125	F	S	NH	A	Y	Y	0	0	0	1	0	0
1126	F	S	NH	A	Y	Y	0	0	0	1	1	0
1127	F	S	NH	A	Y	Y	0	0	0	1	0	1
1128	M	S	NH	A	Y	Y	0	1	1	0	0	0
1129	M	S	NH	A	Y	Y	0	1	0	0	0	0
1130	M	S	NH	A	Y	Y	0	0	0	1	0	0
1131	M	S	NH	A	Y	Y	0	0	1	1	0	0
1132	F	S	NH	A	Y	Y	0	0	1	1	0	0
1133	F	S	NH	A	Y	Y	0	0	1	1	0	0
1134	F	S	NH	N	Y	Y	1	0	0	0	1	0
1135	F	S	NH	N	Y	Y	0	0	0	1	0	1
1136	M	S	NH	N	Y	Y	0	0	0	1	0	1
1137	F	S	NH	N	Y	Y	0	0	1	0	0	1
1138	F	S	NH	N	Y	Y	0	0	1	1	0	0
1139	M	S	NH	N	Y	Y	0	0	0	1	0	0
1140	F	S	NH	N	Y	Y	1	0	0	1	1	0
1141	F	S	NH	N	Y	Y	0	0	0	0	0	0
1142	F	S	NH	N	Y	Y	0	0	1	0	1	0
1143	M	S	NH	N	Y	Y	0	0	0	1	0	0
1144	M	S	NH	N	Y	Y	0	0	1	0	1	0
